# Supplementary material for: Lipophilicity Determination of Antifungal Isoxazolo[3,4-b]pyridin-3(1H)-ones and Their N1-Substituted Derivatives with Chromatographic and Computational Methods
Source: MDPI journal article supplement (doi:10.3390/molecules24234311), 2019-11-26

# Lipophilicity determination of antifungal isoxazolo[3,4-*b*]pyridin-3(1*H*)-ones and their N1-substituted derivatives with chromatographic and computational methods

Krzesimir Ciura<sup>1\*</sup>, Joanna Fedorowicz<sup>2</sup>, Filip Andrić<sup>3</sup>, Petar Žuvela<sup>4\*\*</sup>, Katarzyna Ewa Greber<sup>1</sup>, Paweł Baranowski<sup>1</sup>, Piotr Kawczak<sup>4</sup>, Joanna Nowakowska<sup>1</sup>, Tomasz Bączek<sup>4</sup>, Jarosław Sączewski<sup>5</sup>

<sup>1</sup> Department of Physical Chemistry, Faculty of Pharmacy, Medical University of Gdańsk, Al. Gen. J. Hallera 107, 80-416, Gdańsk, Poland

<sup>2</sup> Department of Chemical Technology of Drugs, Faculty of Pharmacy, Medical University of Gdańsk, Al. Gen. J. Hallera 107, 80-416, Gdańsk, Poland

<sup>3</sup> Department for Analytical Chemistry, Faculty of Chemistry, University of Belgrade, Studentski trg 12–16, 11000, Belgrade, Serbia

<sup>4</sup> Department of Pharmaceutical Chemistry, Faculty of Pharmacy, Medical University of Gdansk, Al. Gen. J. Hallera 107, 80-416 Gdańsk, Poland

<sup>5</sup> Department of Organic Chemistry, Faculty of Pharmacy, Medical University of Gdańsk, Al. Gen. J. Hallera 107, 80-416, Gdańsk, Poland

\* Correspondence: [krzesimir.ciura@gumed.edu.pl](mailto:krzesimir.ciura@gumed.edu.pl)

\*\* Current address: Department of Chemistry, National University of Singapore, Singapore 117543, Singapore

**Table 1S.** Chemical names and structural formulas of the studied of pyrido- and quinolino-isoxazolones

| No. | Chemical name                                                            | Chemical structure                                                                    |
|-----|--------------------------------------------------------------------------|---------------------------------------------------------------------------------------|
| 1   | isoxazolo[3,4- <i>b</i> ]quinolin-3(1 <i>H</i> )-one                     | 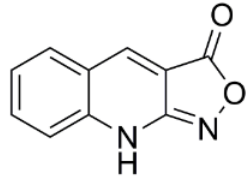   |
| 2   | 1-benzylisoxazolo[3,4- <i>b</i> ]quinolin-3(1 <i>H</i> )-one             |    |
| 3   | 1-methylisoxazolo[3,4- <i>b</i> ]quinolin-3(1 <i>H</i> )-one             |   |
| 4   | 1-acetylisoxazolo[3,4- <i>b</i> ]quinolin-3(1 <i>H</i> )-one             |  |
| 5   | 1-benzoylisoxazolo[3,4- <i>b</i> ]quinolin-3(1 <i>H</i> )-one            |  |
| 6   | 1-benzyl-4,6-dimethylisoxazolo[3,4- <i>b</i> ]pyridin-3(1 <i>H</i> )-one |  |

|    |                                                                                         |                                                                                       |
|----|-----------------------------------------------------------------------------------------|---------------------------------------------------------------------------------------|
| 7  | 1-acetyl-4,6-dimethylisoxazolo[3,4- <i>b</i> ]pyridin-3(1 <i>H</i> )-one                | 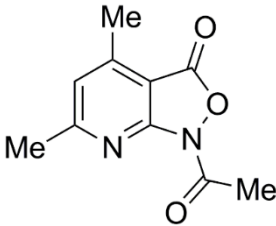   |
| 8  | 1-ethyl-4,6-dimethylisoxazolo[3,4- <i>b</i> ]pyridin-3(1 <i>H</i> )-one                 |    |
| 9  | 1-benzoyl-4,6-dimethylisoxazolo[3,4- <i>b</i> ]pyridin-3(1 <i>H</i> )-one               |    |
| 10 | 1,4,6-trimethylisoxazolo[3,4- <i>b</i> ]pyridin-3(1 <i>H</i> )-one                      |   |
| 11 | 1-(3,5-dimethoxybenzyl)-4,6-dimethylisoxazolo[3,4- <i>b</i> ]pyridin-3(1 <i>H</i> )-one |  |
| 12 | 4,6-dimethyl-1-(methylsulfonyl)isoxazolo[3,4- <i>b</i> ]pyridin-3(1 <i>H</i> )-one      |  |
| 13 | 1-butyl-4,6-dimethylisoxazolo[3,4- <i>b</i> ]pyridin-3(1 <i>H</i> )-one                 |  |
| 14 | 4,6-dimethylisoxazolo[3,4- <i>b</i> ]pyridin-3(1 <i>H</i> )-one                         |  |

|    |                                                                                            |  |
|----|--------------------------------------------------------------------------------------------|--|
| 15 | 4,6-dimethyl-1-propylisoxazolo[3,4- <i>b</i> ]pyridin-3(1 <i>H</i> )-one                   |  |
| 16 | 4,6-dimethyl-1-(prop-2-yn-1-yl)isoxazolo[3,4- <i>b</i> ]pyridin-3(1 <i>H</i> )-one         |  |
| 17 | 1-(4-fluorobenzoyl)-4,6-dimethylisoxazolo[3,4- <i>b</i> ]pyridin-3(1 <i>H</i> )-one        |  |
| 18 | 1-(3,4,5-trimethoxybenzyl)-4,6-dimethylisoxazolo[3,4- <i>b</i> ]pyridin-3(1 <i>H</i> )-one |  |
| 19 | 6-methoxy-1-methylisoxazolo[3,4- <i>b</i> ]quinolin-3(1 <i>H</i> )-one                     |  |
| 20 | 6-fluoro-1-methylisoxazolo[3,4- <i>b</i> ]quinolin-3(1 <i>H</i> )-one                      |  |
| 21 | 6-chloro-1-methylisoxazolo[3,4- <i>b</i> ]quinolin-3(1 <i>H</i> )-one                      |  |
| 22 | 1,6,7-trimethylisoxazolo[3,4- <i>b</i> ]quinolin-3(1 <i>H</i> )-one                        |  |

23 5,8-dimethoxyisoxazolo[3,4-*b*]quinolin-3(1*H*)-one

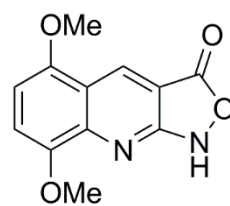

24 1,7-dimethylisoxazolo[3,4-*b*]quinolin-3(1*H*)-one

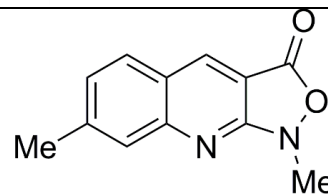

25 5,8-dimethoxy-1-methylisoxazolo[3,4-*b*]quinolin-3(1*H*)-one

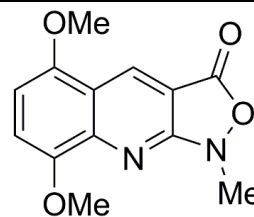

26 1,6-dimethylisoxazolo[3,4-*b*]quinolin-3(1*H*)-one

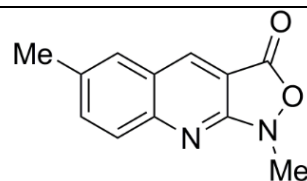

**Table 2S.** Minimum, maximum and mean value of log*P*-s calculated by different software

|                  | mean log P | minimal<br>log P | maximal<br>log P |
|------------------|------------|------------------|------------------|
| log P Chem Draw  | 1.88       | -0.42            | 3.10             |
| Clog P Chem Draw | 2.44       | 0.11             | 4.10             |
| vlogp            | 2.45       | 0.95             | 3.43             |
| LogPC Spartan    | 2.65       | 0.69             | 4.47             |
| LogPV Spartan    | 0.76       | -0.71            | 4.72             |
| miLogP           | 1.95       | 0.54             | 3.16             |
| log KOWWIN       | 2.29       | -0.04            | 3.94             |
| AlogPs           | 2.26       | 0.72             | 3.67             |
| AClogP           | 2.46       | 1.24             | 3.52             |
| AlogpP           | 2.56       | 0.96             | 3.95             |
| MlogGP           | 2.51       | 1.02             | 3.70             |
| XlogP2           | 2.11       | 0.72             | 3.44             |
| XlogP3           | 2.58       | 0.92             | 3.96             |

**Table 3S.** Retention data for the investigated pyrido- and quinolino-isoxazolones obtained from the Soczewiński–Wachtmeister’s with statistical parameters

| Stationary phase: C <sub>8</sub> bonded silica gel |         |                |        |            |       |       |          |       |
|----------------------------------------------------|---------|----------------|--------|------------|-------|-------|----------|-------|
| Mobile phase: MeOH-Water                           |         |                |        |            |       |       |          |       |
| No                                                 | $R_M^0$ | $\sigma R_M^0$ | $m$    | $\sigma m$ | $R$   | $R^2$ | $F$      | $s$   |
| 1                                                  | 1.496   | 0.102          | -2.198 | 0.151      | 0.991 | 0.981 | 210.480  | 0.063 |
| 2                                                  | 3.120   | 0.146          | -3.730 | 0.217      | 0.993 | 0.987 | 296.732  | 0.091 |
| 3                                                  | 2.162   | 0.092          | -2.805 | 0.137      | 0.995 | 0.991 | 418.648  | 0.057 |
| 4                                                  | 1.893   | 0.067          | -2.593 | 0.100      | 0.997 | 0.994 | 672.229  | 0.042 |
| 5                                                  | 2.929   | 0.096          | -3.592 | 0.144      | 0.997 | 0.994 | 626.162  | 0.060 |
| 6                                                  | 3.293   | 0.214          | -4.063 | 0.318      | 0.988 | 0.976 | 163.499  | 0.133 |
| 7                                                  | 1.791   | 0.121          | -2.477 | 0.180      | 0.990 | 0.979 | 189.270  | 0.075 |
| 8                                                  | 2.175   | 0.089          | -2.772 | 0.132      | 0.995 | 0.991 | 438.375  | 0.055 |
| 9                                                  | 2.834   | 0.156          | -3.539 | 0.231      | 0.992 | 0.983 | 233.815  | 0.097 |
| 10                                                 | 1.919   | 0.094          | -2.558 | 0.140      | 0.994 | 0.988 | 334.492  | 0.059 |
| 11                                                 | 3.477   | 0.106          | -4.192 | 0.158      | 0.997 | 0.994 | 706.077  | 0.066 |
| 12                                                 | 2.238   | 0.164          | -2.094 | 0.244      | 0.973 | 0.949 | 73.798   | 0.101 |
| 13                                                 | 2.988   | 0.065          | -3.555 | 0.096      | 0.999 | 0.997 | 1357.867 | 0.040 |
| 14                                                 | 0.991   | 0.058          | -1.831 | 0.086      | 0.996 | 0.991 | 455.085  | 0.036 |
| 15                                                 | 2.722   | 0.103          | -3.391 | 0.153      | 0.996 | 0.992 | 489.391  | 0.064 |
| 16                                                 | 1.951   | 0.075          | -2.734 | 0.111      | 0.997 | 0.993 | 602.508  | 0.047 |
| 17                                                 | 2.864   | 0.133          | -3.579 | 0.198      | 0.994 | 0.988 | 326.728  | 0.083 |
| 18                                                 | 2.808   | 0.097          | -3.476 | 0.144      | 0.997 | 0.993 | 583.604  | 0.060 |
| 19                                                 | 2.421   | 0.049          | -3.023 | 0.072      | 0.999 | 0.998 | 1746.354 | 0.030 |
| 20                                                 | 2.123   | 0.040          | -2.780 | 0.059      | 0.999 | 0.998 | 2223.849 | 0.025 |
| 21                                                 | 2.568   | 0.079          | -3.182 | 0.118      | 0.997 | 0.995 | 732.630  | 0.049 |
| 22                                                 | 2.907   | 0.058          | -3.498 | 0.087      | 0.999 | 0.998 | 1632.503 | 0.036 |
| 23                                                 | 2.123   | 0.027          | -2.664 | 0.041      | 1.000 | 0.999 | 4242.300 | 0.017 |
| 24                                                 | 2.431   | 0.031          | -3.033 | 0.046      | 1.000 | 0.999 | 4333.181 | 0.019 |
| 25                                                 | 2.557   | 0.036          | -3.026 | 0.054      | 0.999 | 0.999 | 3161.924 | 0.023 |
| 26                                                 | 2.461   | 0.089          | -2.990 | 0.133      | 0.996 | 0.992 | 508.969  | 0.055 |

Table 3S. (continued)

| Stationary phase: C <sub>18</sub> bonded silica gel |         |                |        |            |       |       |          |       |
|-----------------------------------------------------|---------|----------------|--------|------------|-------|-------|----------|-------|
| Mobile phase: MeOH-Water                            |         |                |        |            |       |       |          |       |
| No                                                  | $R_M^0$ | $\sigma R_M^0$ | $m$    | $\sigma m$ | $R$   | $R^2$ | $F$      | $s$   |
| 1                                                   | 2.771   | 0.163          | -3.153 | 0.200      | 0.999 | 0.997 | 1183.611 | 0.019 |
| 2                                                   | 3.702   | 0.213          | -4.031 | 0.262      | 0.994 | 0.987 | 236.093  | 0.083 |
| 3                                                   | 2.045   | 0.060          | -2.414 | 0.074      | 0.999 | 0.997 | 1056.838 | 0.023 |
| 4                                                   | 1.935   | 0.035          | -2.440 | 0.043      | 1.000 | 0.999 | 3170.983 | 0.014 |
| 5                                                   | 3.143   | 0.117          | -3.561 | 0.144      | 0.998 | 0.995 | 609.047  | 0.046 |
| 6                                                   | 3.012   | 0.142          | -3.363 | 0.175      | 0.996 | 0.992 | 367.840  | 0.055 |
| 7                                                   | 1.616   | 0.053          | -2.087 | 0.066      | 0.999 | 0.997 | 1013.956 | 0.021 |
| 8                                                   | 2.098   | 0.041          | -2.465 | 0.050      | 0.999 | 0.999 | 2383.061 | 0.016 |
| 9                                                   | 2.901   | 0.056          | -3.345 | 0.069      | 0.999 | 0.999 | 2359.717 | 0.022 |
| 10                                                  | 1.775   | 0.071          | -2.186 | 0.088      | 0.998 | 0.995 | 620.512  | 0.028 |
| 11                                                  | 3.041   | 0.132          | -3.324 | 0.162      | 0.996 | 0.993 | 419.007  | 0.051 |
| 12                                                  | 3.017   | 0.669          | -3.633 | 0.823      | 0.931 | 0.867 | 19.491   | 0.260 |
| 13                                                  | 3.175   | 0.084          | -3.457 | 0.104      | 0.999 | 0.997 | 1108.349 | 0.033 |
| 14                                                  | 0.945   | 0.263          | -1.841 | 0.323      | 0.957 | 0.915 | 32.394   | 0.102 |
| 15                                                  | 2.770   | 0.058          | -3.111 | 0.071      | 0.999 | 0.998 | 1927.377 | 0.022 |
| 16                                                  | 1.948   | 0.056          | -2.641 | 0.068      | 0.999 | 0.998 | 1494.420 | 0.022 |
| 17                                                  | 3.158   | 0.038          | -3.649 | 0.047      | 1.000 | 0.999 | 5987.251 | 0.015 |
| 18                                                  | 3.151   | 0.052          | -3.743 | 0.064      | 1.000 | 0.999 | 3382.991 | 0.020 |
| 19                                                  | 2.509   | 0.094          | -2.888 | 0.116      | 0.998 | 0.995 | 618.312  | 0.037 |
| 20                                                  | 2.314   | 0.104          | -2.778 | 0.128      | 0.997 | 0.994 | 473.594  | 0.040 |
| 21                                                  | 2.412   | 0.171          | -2.718 | 0.210      | 0.991 | 0.982 | 167.234  | 0.066 |
| 22                                                  | 3.028   | 0.131          | -3.319 | 0.161      | 0.996 | 0.993 | 425.171  | 0.051 |
| 23                                                  | 2.066   | 0.101          | -2.569 | 0.125      | 0.996 | 0.993 | 425.453  | 0.039 |
| 24                                                  | 2.731   | 0.131          | -3.107 | 0.162      | 0.996 | 0.992 | 369.059  | 0.051 |
| 25                                                  | 2.664   | 0.137          | -2.980 | 0.169      | 0.995 | 0.990 | 310.187  | 0.054 |
| 26                                                  | 2.771   | 0.163          | -3.153 | 0.200      | 0.994 | 0.988 | 247.242  | 0.063 |

$R$  the coefficient of correlation,  $R^2$  the coefficient of determination,  $F$  the value of the Snedecor's  $F$ -test,  $s$  the standard estimation error,  $p$  value < 0.05.



**Table 4S.** Antifungal activity toward references *Candida* species [1–3]

| No. | <i>Candida albicans</i><br>ATCC 10231 | <i>Candida glabrata</i> ATCC<br>66032 | <i>Candida lusitanae</i> ATCC<br>34499 | <i>Candida parapsilosis</i> ATCC<br>22019 | <i>Candida tropicalis</i> ATCC<br>750 |
|-----|---------------------------------------|---------------------------------------|----------------------------------------|-------------------------------------------|---------------------------------------|
| 1   | >128                                  | >128                                  | >128                                   | >128                                      | >128                                  |
| 2   | >128                                  | >128                                  | >128                                   | >128                                      | >128                                  |
| 3   | >128                                  | >128                                  | >128                                   | >128                                      | >128                                  |
| 4   | >128                                  | >128                                  | >128                                   | >128                                      | >128                                  |
| 5   | >128                                  | >128                                  | >128                                   | >128                                      | >128                                  |
| 6   | 100                                   | >200                                  | 100                                    | >200                                      | >200                                  |
| 7   | >200                                  | >200                                  | 100                                    | >200                                      | >200                                  |
| 8   | >200                                  | >200                                  | >200                                   | >200                                      | >200                                  |
| 9   | 50                                    | 50                                    | 50                                     | 50                                        | 50                                    |
| 10  | >200                                  | >200                                  | >200                                   | >200                                      | >200                                  |
| 11  | >200                                  | >200                                  | >200                                   | 100                                       | >200                                  |
| 12  | 100                                   | >200                                  | 100                                    | >200                                      | >200                                  |
| 13  | nt                                    | nt                                    | nt                                     | nt                                        | nt                                    |
| 14  | >200                                  | >200                                  | 50                                     | >200                                      | 100                                   |
| 15  | 100                                   | >200                                  | 50                                     | <6.2                                      | 25                                    |
| 16  | 100                                   | >200                                  | >200                                   | <6.2                                      | >200                                  |
| 17  | 50                                    | 100                                   | 25                                     | <6.2                                      | 100                                   |
| 18  | >200                                  | >200                                  | >200                                   | 100                                       | >200                                  |
| 19  | >128                                  | >128                                  | >128                                   | >128                                      | >128                                  |
| 20  | >128                                  | >128                                  | >128                                   | >128                                      | >128                                  |
| 21  | >128                                  | >128                                  | >128                                   | >128                                      | >128                                  |
| 22  | >128                                  | >128                                  | >128                                   | >128                                      | >128                                  |
| 23  | >128                                  | >128                                  | >128                                   | >128                                      | >128                                  |
| 24  | >128                                  | >128                                  | >128                                   | >128                                      | >128                                  |
| 25  | >128                                  | >128                                  | >128                                   | >128                                      | >128                                  |
| 26  | >128                                  | >128                                  | >128                                   | >128                                      | >128                                  |

nt – not tested

1. Saczewski, J.; Fedorowicz, J.; Korcz, M.; Saczewski, F.; Wicher, B.; Gdaniec, M.; Konopacka, A. Experimental and theoretical studies on the tautomerism and reactivity of isoxazolo[3,4-b]quinolin-3(1H)-ones. *Tetrahedron* **2015**, *71*, 8975–8984.
2. Saczewski, J.; Fedorowicz, J.; Kedzia, A.; Ziolkowska-Klinkosz, M.; Jalińska, A. Synthesis and Antifungal Activity of Some 4,6-Dimethylisoxazolo[3,4-b]pyridin-3(1H)-one Derivatives. *Med. Chem. (Los. Angeles)*. **2016**, *12*, 640–646.
3. Saczewski, J.; Kedzia, A.; Jalińska, A. New derivatives of 4,6-dimethylisoxazolo[3,4-b] pyridin-3(1H)-one: Synthesis, tautomerism, electronic structure and antibacterial activity. *Heterocycl. Commun.* **2014**, *20*, 215–223.

**Table 5S.** Cross-validation – analysis of variance summary for the TLC C<sub>8</sub> QSRR model.

| Source of<br>ariance | <i>SS</i> | <i>df</i> | <i>MS</i> | <i>F</i> | Prob. > <i>F</i> |
|----------------------|-----------|-----------|-----------|----------|------------------|
| Total                | 16.512    | 17        | 0.971     | 49.44    | 4.66E-6          |
| Fit                  | 16.121    | 8         | 2.015     |          |                  |
| Residual             | 0.391     | 9         | 0.0408    |          |                  |

*SS* – sum of squares, *df* – degrees of freedom, *MS* – median square, *F* – Fisher test statistic.

**Table 6S.** Cross-validation – analysis of variance summary for the TLC C<sub>18</sub> QSRR model.

| Source of<br>ariance | <i>SS</i> | <i>df</i> | <i>MS</i> | <i>F</i> | Prob. > <i>F</i> |
|----------------------|-----------|-----------|-----------|----------|------------------|
| Total                | 16.463    | 17        | 0.968     | 244.26   | 8.60E-9          |
| Fit                  | 16.354    | 8         | 2.044     |          |                  |
| Residual             | 0.109     | 9         | 0.008     |          |                  |

*SS* – sum of squares, *df* – degrees of freedom, *MS* – median square, *F* – Fisher test statistic.

**Table 7S.** Cross-validation – analysis of variance summary for the HPLC log<sub>k</sub> QSRR model.

| Source of<br>ariance | <i>SS</i> | <i>df</i> | <i>MS</i> | <i>F</i> | Prob. > <i>F</i> |
|----------------------|-----------|-----------|-----------|----------|------------------|
| Total                | 16.429    | 17        | 0.966     | 31.56    | 2.62E-5          |
| Fit                  | 15.979    | 8         | 1.997     |          |                  |
| Residual             | 0.451     | 9         | 0.063     |          |                  |

*SS* – sum of squares, *df* – degrees of freedom, *MS* – median square, *F* – Fisher test statistic.

**Table 8S.** Cross-validation – analysis of variance summary for the MEKC log<sub>k</sub> QSRR model.

| Source of<br>ariance | <i>SS</i> | <i>df</i> | <i>MS</i> | <i>F</i> | Prob. > <i>F</i> |
|----------------------|-----------|-----------|-----------|----------|------------------|
| Total                | 16.731    | 17        | 0.984     | 19.54    | 4.47E-5          |
| Fit                  | 16.185    | 10        | 1.619     |          |                  |
| Residual             | 0.546     | 7         | 0.083     |          |                  |

*SS* – sum of squares, *df* – degrees of freedom, *MS* – median square, *F* – Fisher test statistic.

**Table 9S.** List of molecular descriptors with coefficients values in PLS models built for RP-LC and MEKC.

| TLC C <sub>8</sub> QSRR model  |              |              |                                                                                              |                         |
|--------------------------------|--------------|--------------|----------------------------------------------------------------------------------------------|-------------------------|
| No.                            | Name         | Coefficients | Descriptor full name                                                                         | Block                   |
| 1                              | PJI2         | 0.09         | 2D Petitjean shape index                                                                     | Topological indices     |
| 2                              | X5Av         | 0.12         | average valence connectivity index of order 5                                                | Connectivity indices    |
| 3                              | MATS7i       | -0.03        | Moran autocorrelation of lag 7 weighted by ionization potential                              | 2D autocorrelations     |
| 4                              | GATS3p       | 0.08         | Geary autocorrelation of lag 3 weighted by polarizability                                    | 2D autocorrelations     |
| 5                              | GATS5p       | -0.21        | Geary autocorrelation of lag 5 weighted by polarizability                                    | 2D autocorrelations     |
| 6                              | JGI2         | -0.12        | mean topological charge index of order 2                                                     | 2D autocorrelations     |
| 7                              | SpMax2_Bh(s) | -0.11        | largest eigenvalue n. 2 of Burden matrix weighted by I-state                                 | Burden eigenvalues      |
| 8                              | SpMax3_Bh(s) | 0.11         | largest eigenvalue n. 3 of Burden matrix weighted by I-state                                 | Burden eigenvalues      |
| 9                              | Mor19s       | -0.01        | signal 19 / weighted by I-state                                                              | 3D-MoRSE descriptors    |
| 10                             | E2u          | -0.24        | 2nd component accessibility directional WHIM index / unweighted                              | WHIM descriptors        |
| 11                             | E1i          | 0.24         | 1st component accessibility directional WHIM index / weighted by ionization potential        | WHIM descriptors        |
| 12                             | HATS4u       | -0.30        | leverage-weighted autocorrelation of lag 4 / unweighted                                      | GETAWAY descriptors     |
| 13                             | HATS4v       | -0.26        | leverage-weighted autocorrelation of lag 4 / weighted by van der Waals volume                | GETAWAY descriptors     |
| 14                             | R3p          | 0.20         | R autocorrelation of lag 3 / weighted by polarizability                                      | GETAWAY descriptors     |
| 15                             | R4p          | 0.27         | R autocorrelation of lag 4 / weighted by polarizability                                      | GETAWAY descriptors     |
| 16                             | R7p+         | 0.42         | R maximal autocorrelation of lag 7 / weighted by polarizability                              | GETAWAY descriptors     |
| 17                             | CATS3D_08_AL | 0.15         | CATS3D Acceptor-Lipophilic at lag 08                                                         | CATS 3D                 |
| TLC C <sub>18</sub> QSRR model |              |              |                                                                                              |                         |
| No                             | Name         | Coefficients |                                                                                              |                         |
| 1                              | PJI2         | 0.04         | 2D Petitjean shape index                                                                     | Topological indices     |
| 2                              | X5Av         | 0.27         | average valence connectivity index of order 5                                                | Connectivity indices    |
| 3                              | MATS2s       | -0.06        | Moran autocorrelation of lag 2 weighted by I-state                                           | 2D autocorrelations     |
| 4                              | SpMax3_Bh(s) | 0.19         | largest eigenvalue n. 3 of Burden matrix weighted by I-state                                 | Burden eigenvalues      |
| 5                              | DISPp        | -0.11        | displacement value / weighted by polarizability                                              | Geometrical descriptors |
| 6                              | Mor10v       | 0.15         | signal 10 / weighted by van der Waals volume                                                 | 3D-MoRSE descriptors    |
| 7                              | Mor10p       | 0.11         | signal 10 / weighted by polarizability                                                       | 3D-MoRSE descriptors    |
| 8                              | E1e          | 0.08         | 1st component accessibility directional WHIM index / weighted by Sanderson electronegativity | WHIM descriptors        |
| 9                              | E2p          | -0.20        | 2nd component accessibility directional WHIM index / weighted by polarizability              | WHIM descriptors        |

**Table 8S.** (continued)

| 10   | Kv           | 0.18         | K global shape index / weighted by van der Waals volume                              | WHIM descriptors        |
|------|--------------|--------------|--------------------------------------------------------------------------------------|-------------------------|
| 11   | HATS1e       | -0.18        | leverage-weighted autocorrelation of lag 1 / weighted by Sanderson electronegativity | GETAWAY descriptors     |
| 12   | HATS4i       | -0.10        | leverage-weighted autocorrelation of lag 4 / weighted by ionization potential        | GETAWAY descriptors     |
| 13   | R4v+         | -0.08        | R maximal autocorrelation of lag 4 / weighted by van der Waals volume                | GETAWAY descriptors     |
| 14   | R3p          | 0.24         | R autocorrelation of lag 3 / weighted by polarizability                              | GETAWAY descriptors     |
| 15   | R4p          | 0.15         | R autocorrelation of lag 4 / weighted by polarizability                              | GETAWAY descriptors     |
| 16   | CATS3D_03_DL | 0.01         | CATS3D Donor-Lipophilic at lag 03                                                    | CATS 3D                 |
| 17   | CATS3D_08_AL | 0.08         | CATS3D Acceptor-Lipophilic at lag 08                                                 | CATS 3D                 |
| HPLC |              |              |                                                                                      |                         |
| No   | Label        | Coefficients |                                                                                      |                         |
| 1    | ATSC3p       | 0.29         | Centred Broto-Moreau autocorrelation of lag 3 weighted by polarizability             | 2D autocorrelations     |
| 2    | MATS7i       | -0.11        | Moran autocorrelation of lag 7 weighted by ionization potential                      | 2D autocorrelations     |
| 3    | MATS2s       | -0.03        | Moran autocorrelation of lag 2 weighted by I-state                                   | 2D autocorrelations     |
| 4    | SpMax2_Bh(s) | -0.19        | largest eigenvalue n. 2 of Burden matrix weighted by I-state                         | Burden eigenvalues      |
| 5    | SpMax3_Bh(s) | 0.18         | largest eigenvalue n. 3 of Burden matrix weighted by I-state                         | Burden eigenvalues      |
| 6    | DISPi        | -0.15        | displacement value / weighted by ionization potential                                | Geometrical descriptors |
| 7    | E2u          | -0.14        | 2nd component accessibility directional WHIM index / unweighted                      | WHIM descriptors        |
| 8    | Ki           | 0.04         | K global shape index / weighted by ionization potential                              | WHIM descriptors        |
| 9    | HATS4u       | -0.13        | leverage-weighted autocorrelation of lag 4 / unweighted                              | GETAWAY descriptors     |
| 10   | HATS4v       | -0.05        | leverage-weighted autocorrelation of lag 4 / weighted by van der Waals volume        | GETAWAY descriptors     |
| 11   | R4v+         | -0.13        | R maximal autocorrelation of lag 4 / weighted by van der Waals volume                | GETAWAY descriptors     |
| 12   | R3p          | 0.21         | R autocorrelation of lag 3 / weighted by polarizability                              | GETAWAY descriptors     |
| 13   | R4p          | 0.28         | R autocorrelation of lag 4 / weighted by polarizability                              | GETAWAY descriptors     |
| 14   | R7p+         | 0.18         | R maximal autocorrelation of lag 7 / weighted by polarizability                      | GETAWAY descriptors     |
| 15   | R4s          | 0.05         | R autocorrelation of lag 4 / weighted by I-state                                     | GETAWAY descriptors     |
| 16   | R6s+         | 0.19         | R maximal autocorrelation of lag 6 / weighted by I-state                             | GETAWAY descriptors     |
| 17   | CATS3D_08_AL | 0.20         | CATS2D Acceptor-Lipophilic at lag 08                                                 | CATS 3D                 |

**Table 9S.** (continued)

| MECK |              |              |                                                                                              |                             |
|------|--------------|--------------|----------------------------------------------------------------------------------------------|-----------------------------|
| No   | Label        | Coefficients |                                                                                              |                             |
| 1    | VE1_Dz(p)    | 0.14         | coefficient sum of the last eigenvector from Barysz matrix weighted by polarizability        | 2D matrix-based descriptors |
| 2    | Mor24s       | -0.24        | signal 24 / weighted by I-state                                                              | 3D-MoRSE descriptors        |
| 3    | E2u          | 0.52         | 2nd component accessibility directional WHIM index / unweighted                              | WHIM descriptors            |
| 4    | E1e          | 0.24         | 1st component accessibility directional WHIM index / weighted by Sanderson electronegativity | WHIM descriptors            |
| 5    | HATS1e       | -0.56        | leverage-weighted autocorrelation of lag 1 / weighted by Sanderson electronegativity         | GETAWAY descriptors         |
| 6    | HATS7p       | 0.06         | leverage-weighted autocorrelation of lag 7 / weighted by polarizability                      | GETAWAY descriptors         |
| 7    | R4v+         | 0.33         | R maximal autocorrelation of lag 4 / weighted by van der Waals volume                        | GETAWAY descriptors         |
| 8    | R4p          | 0.16         | R autocorrelation of lag 4 / weighted by polarizability                                      | GETAWAY descriptors         |
| 9    | R4p+         | 0.17         | R maximal autocorrelation of lag 4 / weighted by polarizability                              | GETAWAY descriptors         |
| 10   | R6s+         | 0.31         | R maximal autocorrelation of lag 6 / weighted by I-state                                     | GETAWAY descriptors         |
| 11   | CATS3D_08_AA | -0.49        | CATS3D Acceptor-Acceptor at lag 08                                                           | CATS 3D                     |
| 12   | CATS3D_03_LL | -0.33        | CATS3D Lipophilic-Lipophilic at lag 03                                                       | CATS 3D                     |

**Figure 1S.** Optimization of the number of latent variables (LVs) for the consensus GA-PLS models for **A)** TLC with the  $C_8$  plate, **B)** TLC with the  $C_{18}$  plate, **C)** HPLC  $\log k_w$ , and **D)** MEKC  $\log k$  parameters. The optimal number of LVs is denoted in pink.

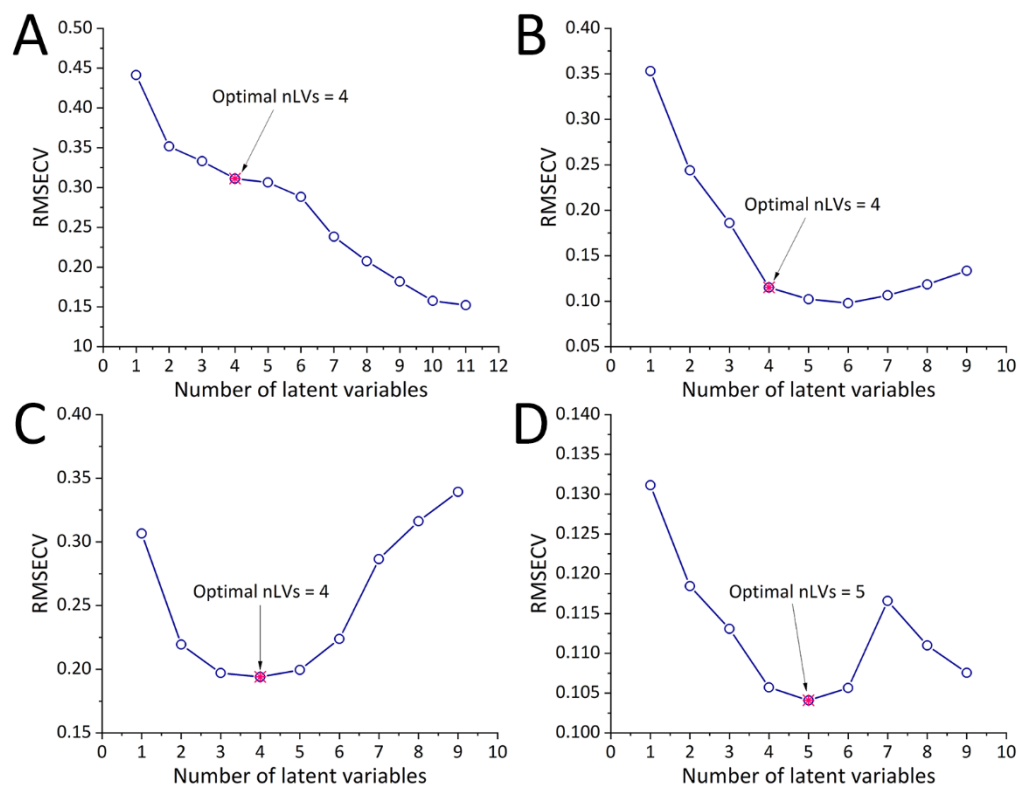

**Figure 2S.** Leave one out-cross validation (LOO-CV) predictive ability (on the training set) for **A)** TLC with the C<sub>8</sub> plate, **B)** TLC with the C<sub>18</sub> plate, **C)** HPLC log<sub>k<sub>w</sub></sub>, and **D)** MEKC log<sub>k</sub> parameters.

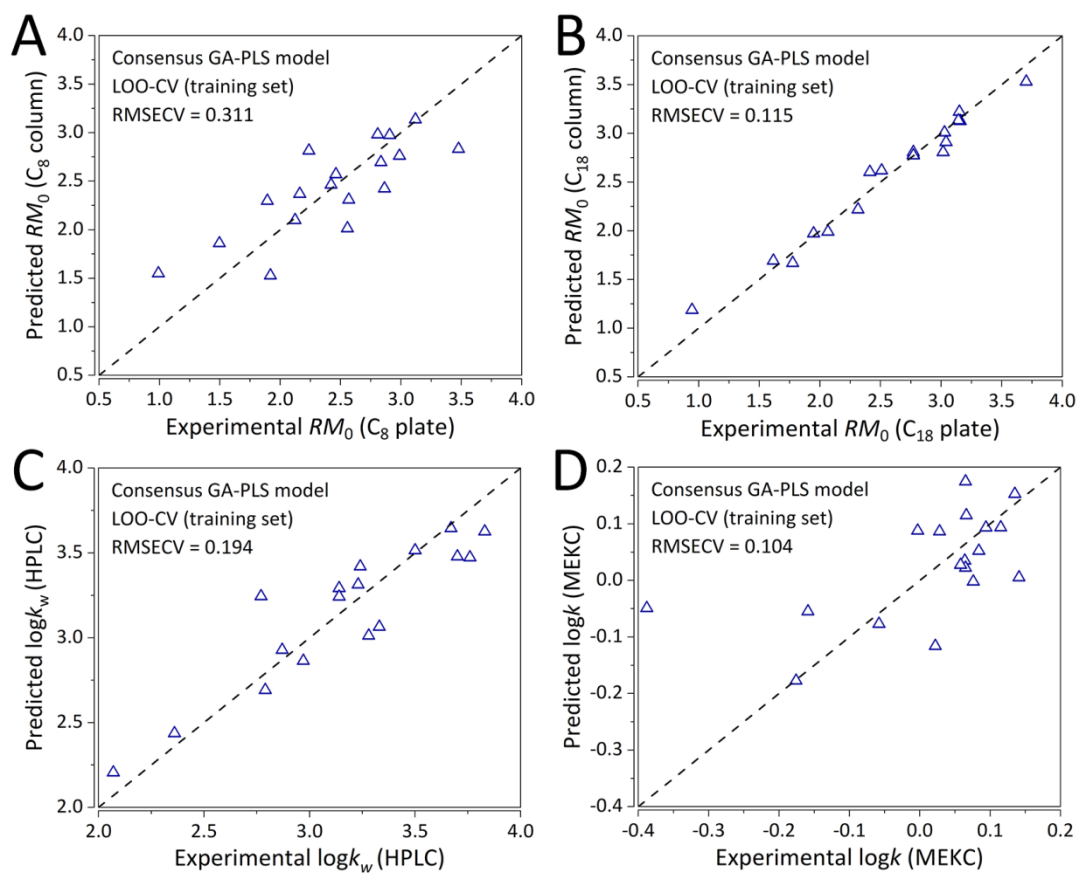

Supplement: s1 [file s1]
